# Supplementary material
Source: publisher figshare collection journal article supplement (https://acs.figshare.com/ndownloader/files/4163791)
Supplement: Supplementary file 1 [file 4163791]

Supplemental Information:

# Improving Open Circuit Potential in Hybrid P3HT:CdSe Bulk Heterojunction Solar Cells via Colloidal *tert*-Butylthiol Ligand Exchange

*Matthew J. Greaney, Saptaparna Das, David H. Webber,*

*Stephen E. Bradforth, and Richard L. Brutchey\**

Department of Chemistry and the Center for Energy Nanoscience, University of Southern California, Los Angeles, California, 90089-0744, USA

## ***Supplemental Characterization***

**Transmission Electron Microscopy (TEM).** TEM images of hybrid films were obtained on a JEOL JEM-2100 microscope at an operating voltage of 200 kV, equipped with a Gatan Orius CCD camera. Samples were prepared with the same 8:1 (wt/wt) ratio of CdSe to P3HT and under identical processing conditions to the working devices. The P3HT:CdSe layer was floated off of the PEDOT:PSS layer in water and collected on a grid for imaging. No significant morphological differences were observed upon comparison of the three different CdSe samples. For each sample, it appeared that the 8:1 (wt/wt) CdSe:P3HT loading produced a uniform distribution of nanocrystals throughout the polymer matrix.

**Atomic Force Microscopy (AFM).** Plain-view AFM images of hybrid films on glass were obtained on a Digital Instruments Dimension 3100 Atomic Force Microscope using intermittent contact mode equipped with a Vista Probes Al coated Si tip with a force constant of 10 N m<sup>-1</sup> and a nominal tip radius of <10 nm.

## Supplemental Figures

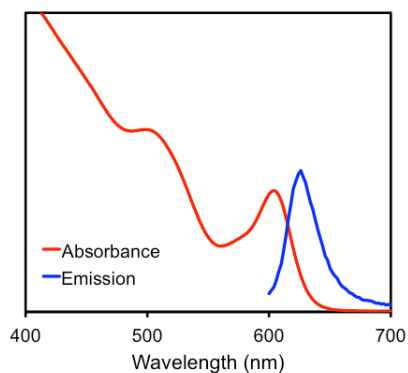

**Figure S1.** UV-vis absorption and PL emission spectra for a dispersion of CdSe(NL) in toluene. A 550 nm excitation wavelength was used for the PL acquisition.

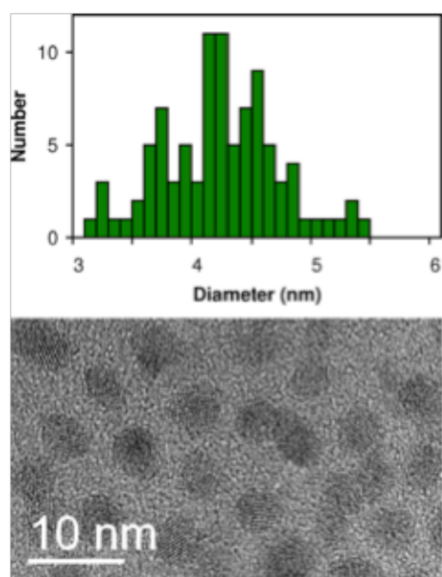

**Figure S2.** TEM image and corresponding particle size histogram for a typical batch of CdSe(NL) nanocrystals. Based on the statistical analysis of 93 nanocrystals, the average diameter was found to be  $4.2 \pm 0.5$  nm, in agreement with the size determined from UV-vis analysis.

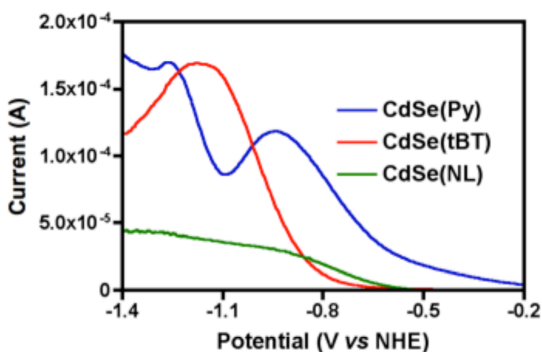

**Figure S3.** DPV of CdSe(NL), CdSe(Py), and CdSe(tBT) spun-cast on ITO collected at  $10 \text{ mV s}^{-1}$  using a Pt wire counter electrode and Ag-wire reference electrode in 0.10 M TBAP.

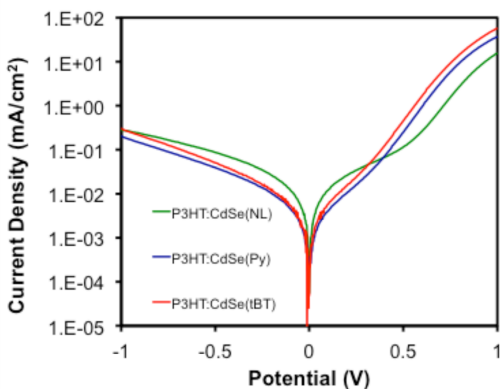

**Figure S4.** Dark  $I$ - $V$  characteristics for P3HT:CdSe(NL), P3HT:CdSe(Py), and P3HT:CdSe(tBT) hybrid solar cells.

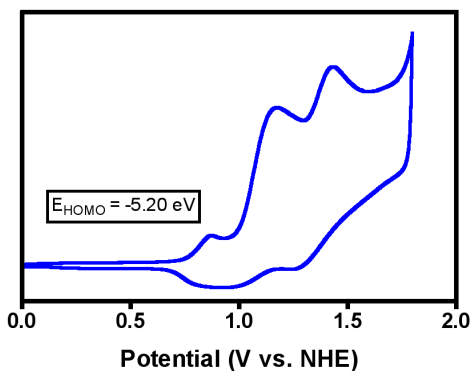

**Figure S5.** CV of P3HT spun-cast onto ITO obtained at a  $20 \text{ mV s}^{-1}$  scan rate using a Pt counter electrode and Ag wire reference electrode in acetonitrile with 0.1 M TBAP as the supporting electrolyte.

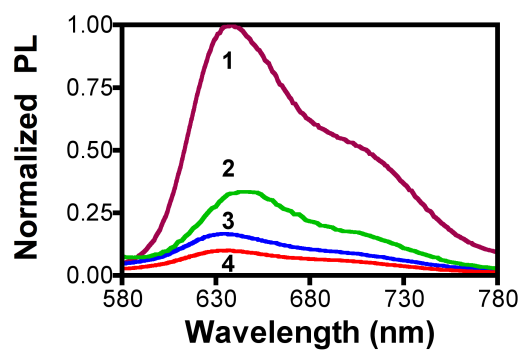

**Figure S6.** Steady-state PL spectra ( $\lambda_{\text{ex}} = 550$  nm) for films of neat P3HT (**1**), P3HT:CdSe(NL) (**2**), P3HT:CdSe(Py) (**3**), and P3HT:CdSe(tBT) (**4**). All hybrid films were prepared using an 8:1 (wt/wt) ratio of CdSe to P3HT. Spectra were normalized to reflect the relative intensities compared to neat P3HT emission at 635 nm.

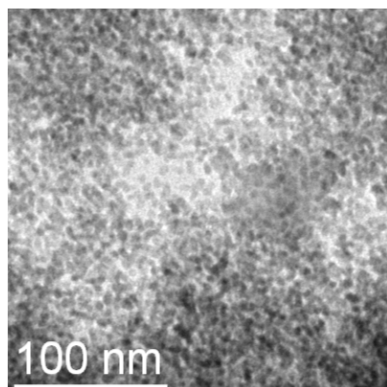

**Figure S7a.** TEM image of P3HT:CdSe(NL).

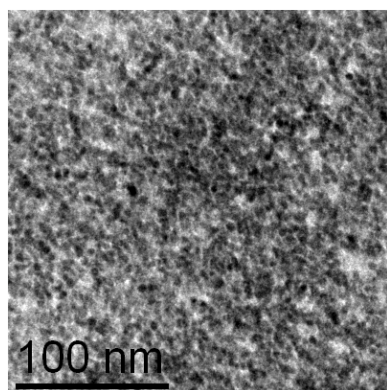

**Figure S7b.** TEM image of P3HT:CdSe(Py).

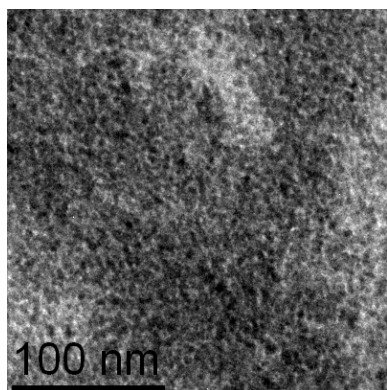

**Figure S7c.** TEM image of P3HT:CdSe(tBT).

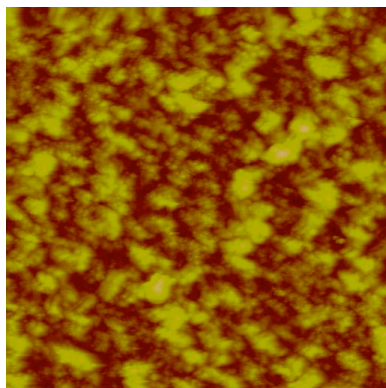

**Figure S8a.** AFM topological image of P3HT:CdSe(NL). Image was obtained using  $5 \times 5 \mu\text{m}$  window with a 53 nm maximum vertical height and an rms roughness of 12 nm.

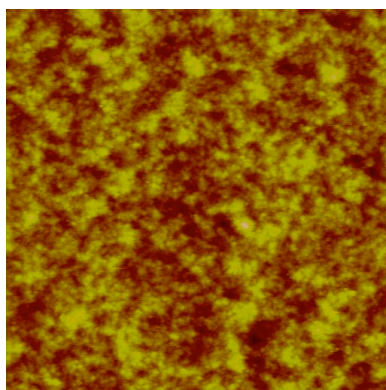

**Figure S8b.** AFM topological image of P3HT:CdSe(Py). Image was obtained using  $5 \times 5 \mu\text{m}$  window with a 39 nm maximum vertical height and an rms roughness of 5 nm.

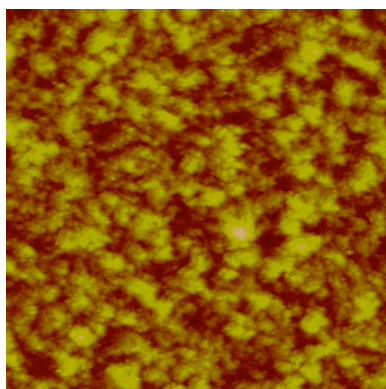

**Figure S8c.** AFM topological image of P3HT:CdSe(tBT). Image was obtained using  $5 \times 5 \mu\text{m}$  window with a 43 nm maximum vertical height and an rms roughness of 10 nm.

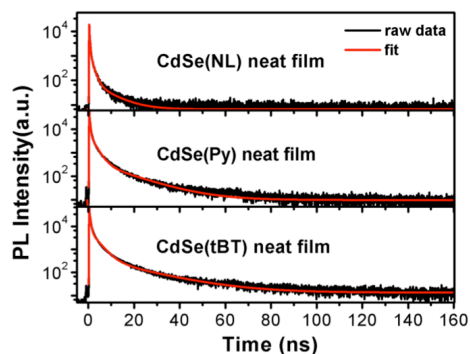

**Figure S9.** PL lifetime decay traces for films of neat CdSe films ( $\lambda_{\text{ex}} = 400$  nm;  $\lambda_{\text{em}} = 650$  nm). Data were fit with a sum of three exponential functions, and lifetimes were determined using a weighted average. Lifetimes of 1.4, 3.3, and 4.4 ns were measured for CdSe(NL), CdSe(Py) and CdSe(tBT), respectively. The fitting parameters are given in Table S2.

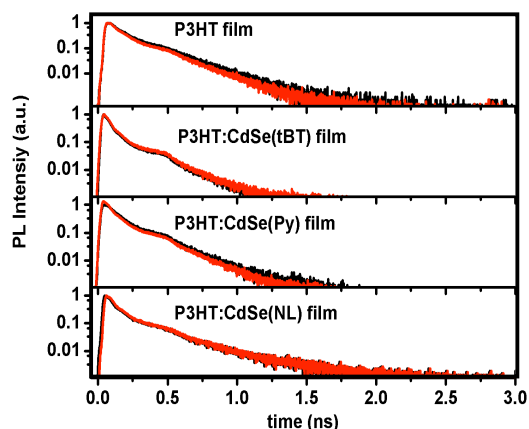

**Figure S10.** Normalized PL lifetime traces of the neat P3HT film and hybrid blends ( $\lambda_{\text{ex}} = 550$  nm;  $\lambda_{\text{em}} = 650$  nm) at two different excitation fluences,  $3 \mu\text{J cm}^{-2}$  (black) and  $6 \mu\text{J cm}^{-2}$  (red).

### *Supplemental Tables*

**Table S1.** Fitting parameters for the PL lifetime measurements of hybrid films.

| Hybrid Film     | $t_1$ (ps) | $a_1$ | $t_2$ (ps) | $a_2$ |
|-----------------|------------|-------|------------|-------|
| P3HT: CdSe(NL)  | 70         | 0.924 | 371        | 0.076 |
| P3HT: CdSe(Py)  | 57         | 0.797 | 182        | 0.203 |
| P3HT: CdSe(tBT) | 30         | 0.839 | 156        | 0.162 |

**Table S2.** Fitting parameters for the PL lifetime measurements of neat CdSe films.

| Acceptor  | $t_1$ (ns) | $a_1$ | $t_2$ (ns) | $a_2$ | $t_3$ (ns) | $a_3$ |
|-----------|------------|-------|------------|-------|------------|-------|
| CdSe(NL)  | 0.20       | 0.630 | 0.89       | 0.220 | 2.24       | 0.15  |
| CdSe(Py)  | 0.31       | 0.517 | 1.24       | 0.314 | 4.82       | 0.169 |
| CdSe(tBT) | 0.45       | 0.493 | 1.29       | 0.351 | 6.60       | 0.156 |
